# Supplementary material for: Accurate variant detection across non-amplified and whole genome amplified DNA using targeted next generation sequencing
Source: PubMed Central journal article supplement (PMC3534403; doi:10.1186/1471-2164-13-500), 2012-09-20

# Supplementary Figures

## Accurate Variant Detection across Non-amplified and Whole Genome Amplified DNA Using Targeted Next Generation Sequencing

Abdou ElSharawy<sup>1</sup>, Jason Warner<sup>2</sup>, Jeff Olson<sup>2</sup>, Michael Forster<sup>1</sup>, Markus B. Schilhabel<sup>1</sup>, Darren Link<sup>2</sup>, Stefan Rose-John<sup>3</sup>, Stefan Schreiber<sup>1,4</sup>, Philip Rosenstiel<sup>1</sup>, James Brayer<sup>2</sup> and Andre Franke<sup>1,\*</sup>

<sup>1</sup> Institute of Clinical Molecular Biology, Christian-Albrechts-University, Kiel, Germany

<sup>2</sup> RainDance Technologies, Inc. Lexington, Massachusetts, U.S.A.

<sup>3</sup> Institute of Biochemistry, Christian-Albrechts-University, Kiel, Germany

<sup>4</sup> First Medical Clinic, University Hospital, Schleswig-Holstein, Kiel, Germany

Email addresses

AE: [a.sharawy@mucosa.de](mailto:a.sharawy@mucosa.de)

JW: [WARNERJ@raindancetech.com](mailto:WARNERJ@raindancetech.com)

JO: [OLSONJ@raindancetech.com](mailto:OLSONJ@raindancetech.com)

MF: [m.forster@ikmb.uni-kiel.de](mailto:m.forster@ikmb.uni-kiel.de)

MS: [m.schilhabel@ikmb.uni-kiel.de](mailto:m.schilhabel@ikmb.uni-kiel.de)

DL: [dlink@raindancetechnologies.com](mailto:dlink@raindancetechnologies.com)

SR: [rosejohn@biochem.uni-kiel.de](mailto:rosejohn@biochem.uni-kiel.de)

SS: [s.schreiber@mucosa.de](mailto:s.schreiber@mucosa.de)

PR: [p.rosenstiel@mucosa.de](mailto:p.rosenstiel@mucosa.de)

JP: [brayerj@raindancetech.com](mailto:brayerj@raindancetech.com)

AF: [a.franke@mucosa.de](mailto:a.franke@mucosa.de)

Supplementary Figure 1

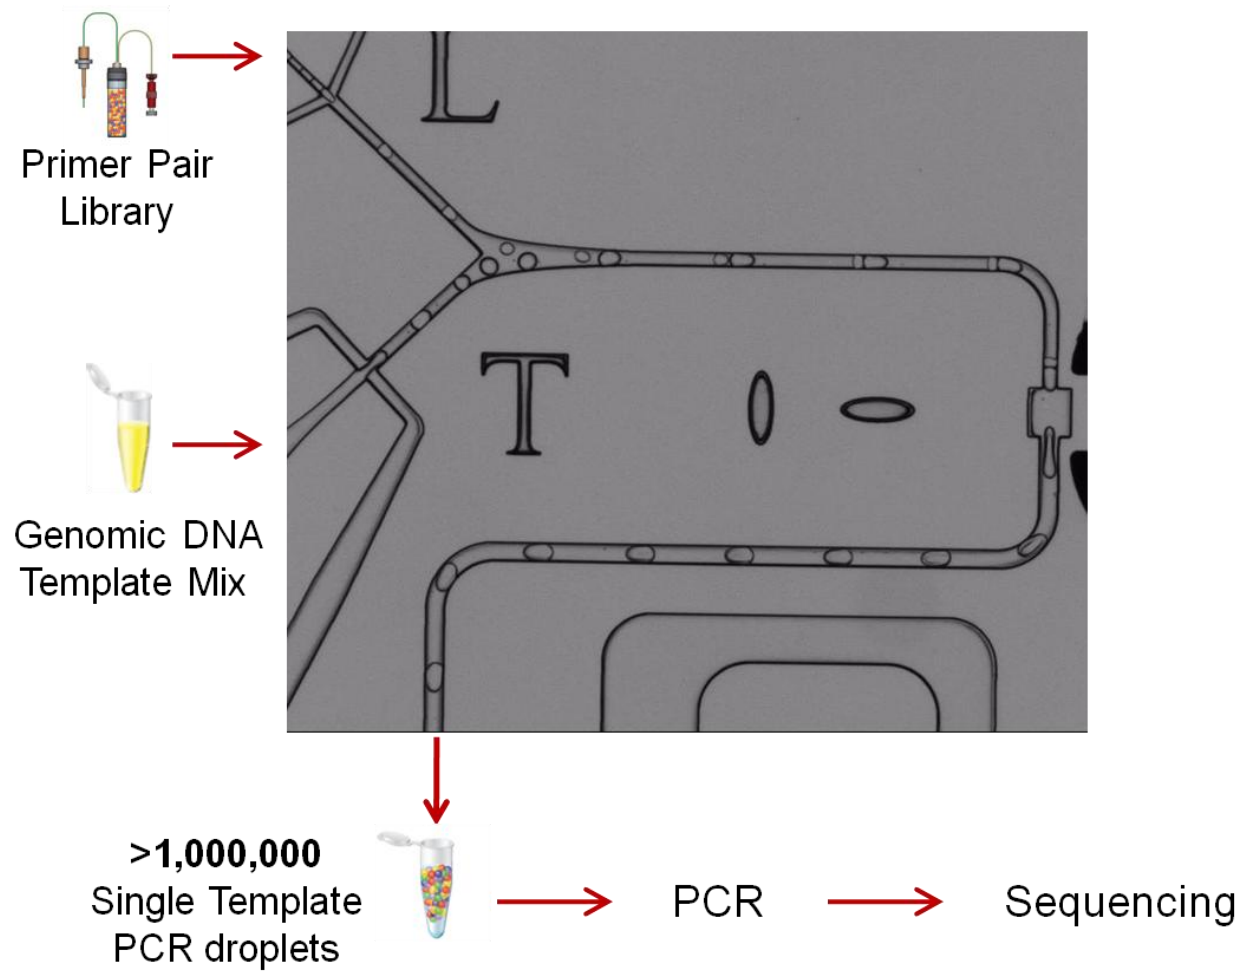

Supplementary Figure 2.A

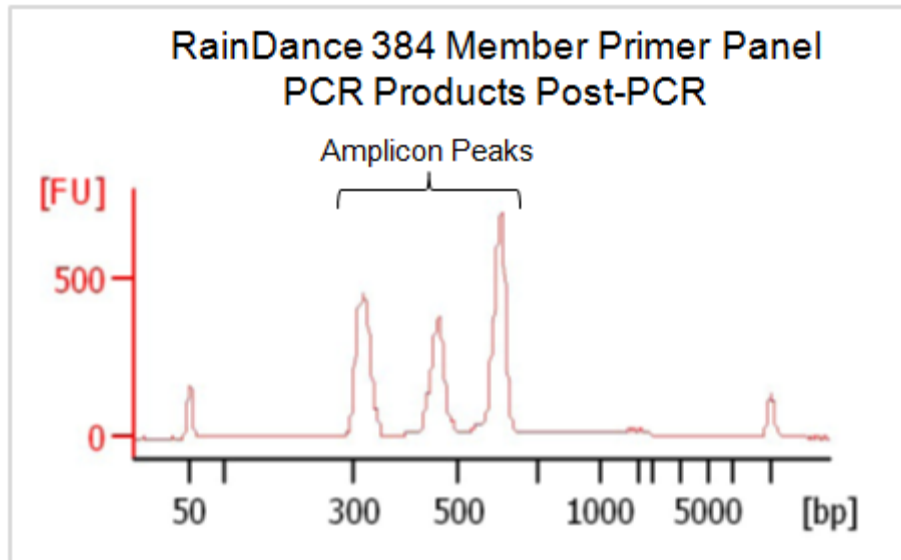

Supplementary Figure 2.B

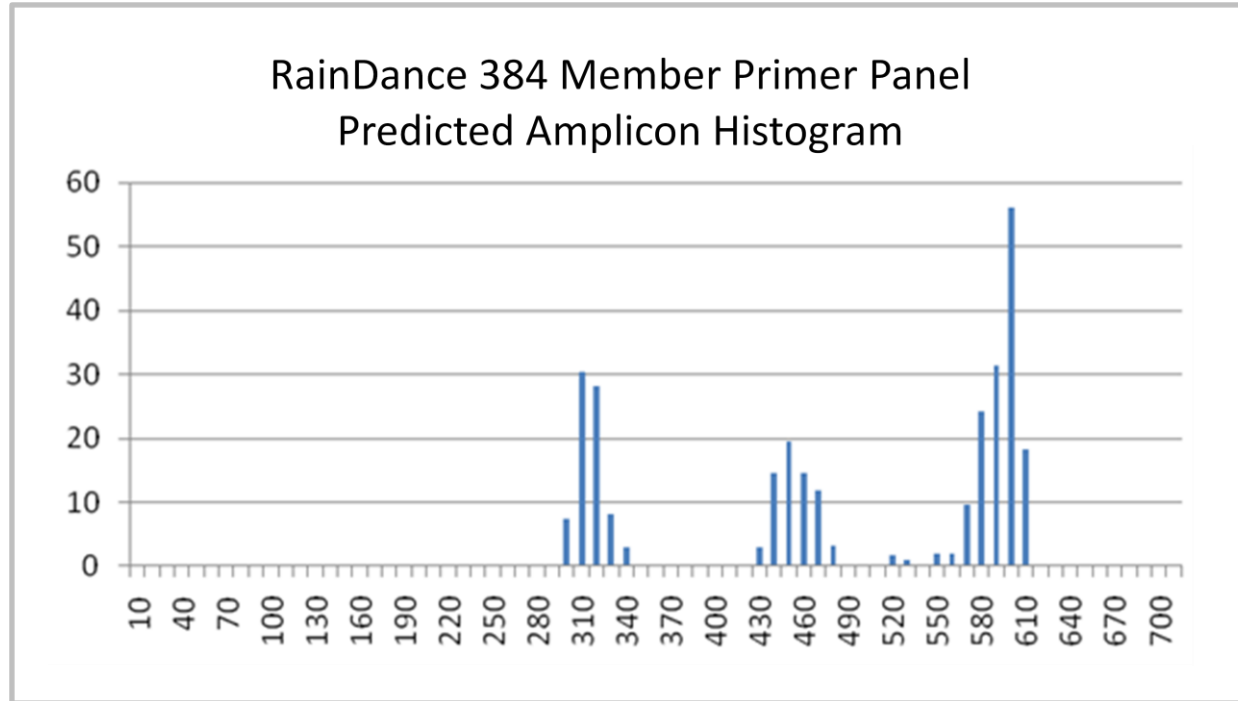

Supplementary Figure 3.A

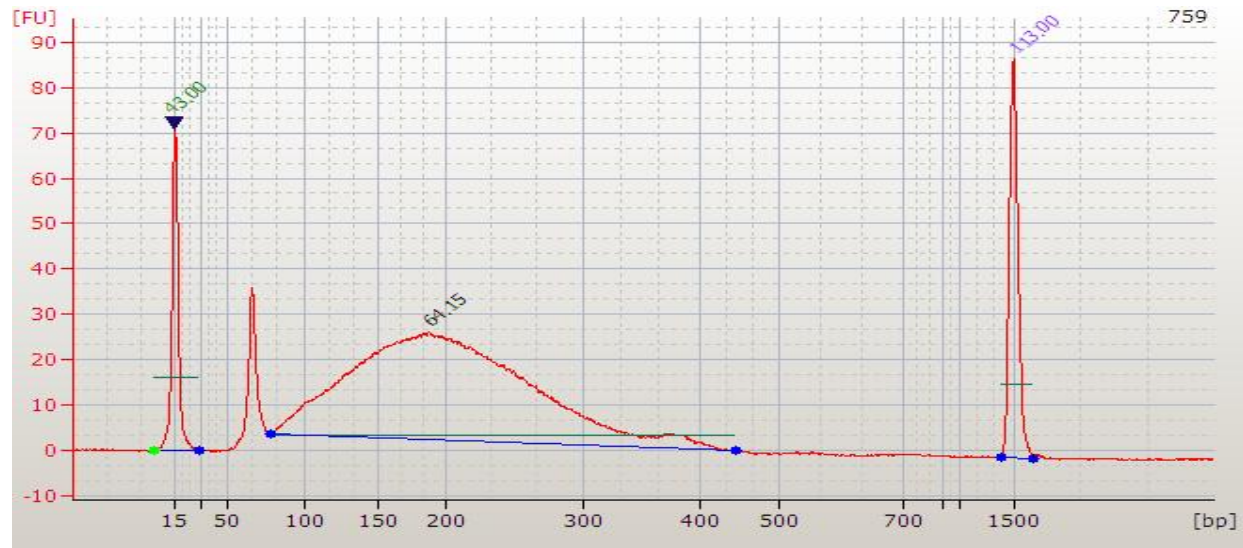

Supplementary Figure 3.B

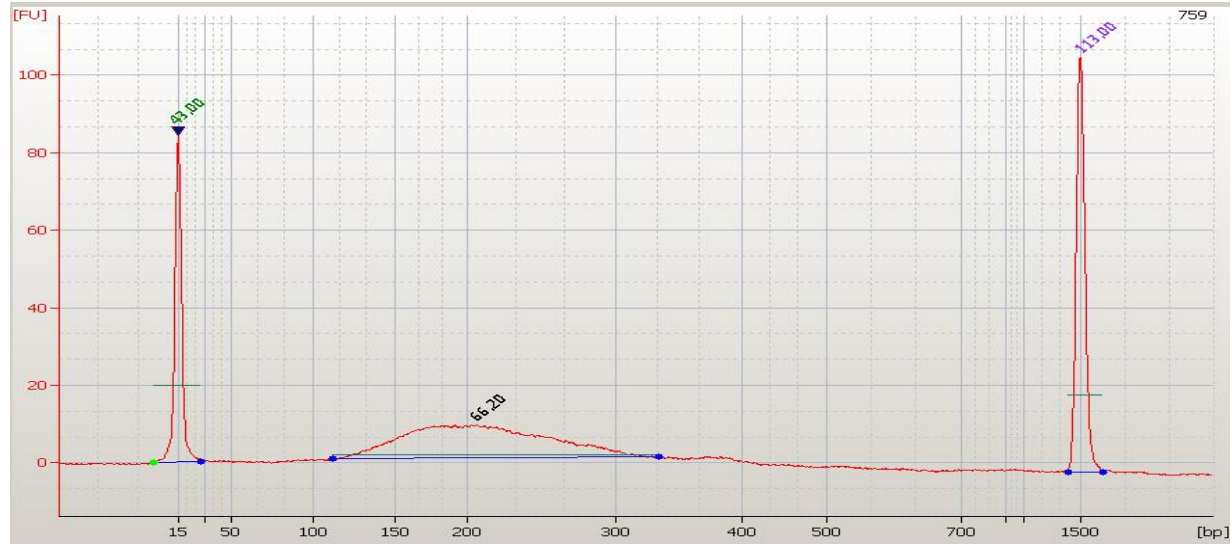

## Supplementary Figure 4

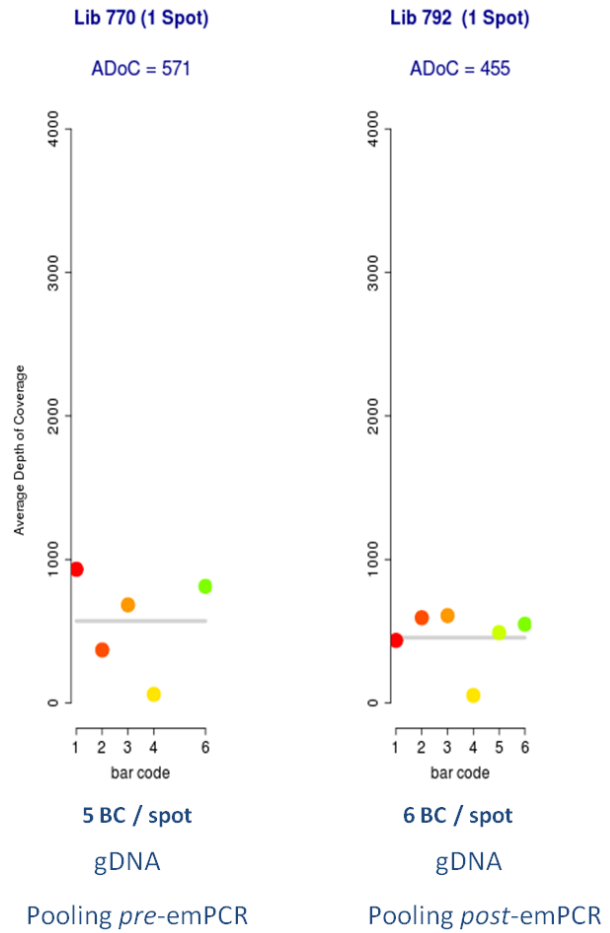

Supplement: 1471-2164-13-500-S1.pdf [file 1471-2164-13-500-S1.pdf]
