# Supplementary material for: Accurate variant detection across non-amplified and whole genome amplified DNA using targeted next generation sequencing
Source: PubMed Central journal article supplement (PMC3534403; doi:10.1186/1471-2164-13-500), 2012-09-20
Supplement: 1471-2164-13-500-S2.pdf [file 1471-2164-13-500-S2.pdf]

# Supplementary Tables

## Accurate Variant Detection across Non-amplified and Whole Genome Amplified DNA Using Targeted Next Generation Sequencing

Abdou ElSharawy<sup>1</sup>, Jason Warner<sup>2</sup>, Jeff Olson<sup>2</sup>, Michael Forster<sup>1</sup>, Markus B. Schilhabel<sup>1</sup>, Darren Link<sup>2</sup>, Stefan Rose-John<sup>3</sup>, Stefan Schreiber<sup>1,4</sup>, Philip Rosenstiel<sup>1</sup>, James Brayer<sup>2</sup> and Andre Franke<sup>1,\*</sup>

<sup>1</sup> Institute of Clinical Molecular Biology, Christian-Albrechts-University, Kiel, Germany

<sup>2</sup> RainDance Technologies, Inc. Lexington, Massachusetts, U.S.A.

<sup>3</sup> Institute of Biochemistry, Christian-Albrechts-University, Kiel, Germany

<sup>4</sup> First Medical Clinic, University Hospital, Schleswig-Holstein, Kiel, Germany

Email addresses

AE: [a.sharawy@mucosa.de](mailto:a.sharawy@mucosa.de)

JW: [WARNERJ@raindancetech.com](mailto:WARNERJ@raindancetech.com)

JO: [OLSONJ@raindancetech.com](mailto:OLSONJ@raindancetech.com)

MF: [m.forster@ikmb.uni-kiel.de](mailto:m.forster@ikmb.uni-kiel.de)

MS: [m.schilhabel@ikmb.uni-kiel.de](mailto:m.schilhabel@ikmb.uni-kiel.de)

DL: [dlink@raindancetechnologies.com](mailto:dlink@raindancetechnologies.com)

SR: [rosejohn@biochem.uni-kiel.de](mailto:rosejohn@biochem.uni-kiel.de)

SS: [s.schreiber@mucosa.de](mailto:s.schreiber@mucosa.de)

PR: [p.rosenstiel@mucosa.de](mailto:p.rosenstiel@mucosa.de)

JP: [brayerj@raindancetech.com](mailto:brayerj@raindancetech.com)

AF: [a.franke@mucosa.de](mailto:a.franke@mucosa.de)

**Supplementary Table 1: Overview of Sample Processing: RainDance Sequence Enrichment, SOLiD Sequencing Library Construction and Sample Indexing, Emulsion PCR and Sequencing**

| Sample ID | HapMap Sample_ID                                        | Family ID     | Library ID | Bar Code | Emulsion ID | Sequencing ID |
|-----------|---------------------------------------------------------|---------------|------------|----------|-------------|---------------|
| 1         | NA12003 (gDNA)                                          | 1420          | 759L       | 1        | 759em       | 759seq        |
| 2         | NA12004 (gDNA)                                          | 1420          | 760L       | 2        | 760em       | 760seq        |
| 3         | NA10838 (gDNA)                                          | 1420          | 761L       | 3        | 761em       | 761seq        |
| 4         | NA11829 (gDNA)                                          | 1350          | 762L       | 4        | 762em       | 762seq        |
| 5         | NA11830 (gDNA)                                          | 1350          | 763L       | 5        | 763em       | 763seq        |
| 6         | NA10856 (gDNA)                                          | 1350          | 764L       | 6        | 764em       | 764seq        |
| 1-6_1     | <b><i>6 DNAs pooled before library preparation</i></b>  | 1350 and 1420 | 768_1L     | -        | 768_1Lem    | 768_1Lseq     |
| 1-6_2     | <b><i>6 DNAs pooled before library preparation*</i></b> | 1350 and 1420 | 768_2L     | -        | 768_2Lem    | 768_2Lseq     |
| 7         | <b><i>Indexed Sample: pooled before emPCR (pB)</i></b>  | 1350 and 1420 | 770L       | 1-4 & 6  | 770em       | 770seq        |
| 8         | <b><i>Indexed samples: pooled after emPCR (pA)</i></b>  | 1350 and 1420 | 792L       | 1-6      | 792em       | 792seq        |
| 9         | NA12003 (WGA gDNA)                                      | 1420          | 765L       | 9        | 765em       | 765seq        |
| 10        | NA12004 (WGA gDNA)                                      | 1420          | 766L       | 10       | 766em       | 766seq        |
| 11        | NA10838 (WGA gDNA)                                      | 1420          | 767L       | 11       | 767em       | 767seq        |

\* Technical replicate of library 786\_1.

- Boldfaced italic words indicate pooled samples/libraries.

- gDNA: genomic DNA; WGA: whole-genome amplification; emPCR: emulsion PCR.

**Supplementary Table 2: RainDance Technologies 384 Member Primer Panel - gff**

**(A separate Excel sheet)**

**Supplementary Table 3: CLC Bio SNP Detection Parameters**

|                                      |          |
|--------------------------------------|----------|
|                                      |          |
| Add conflict annotations             | No       |
| Alignment mode                       | local    |
| Amplicon annotation                  |          |
| Annotate consensus sequence          | Yes      |
| Annotate reference sequence          | Yes      |
| Colospace alignment                  | Yes      |
| Colospace Alignment                  | Yes      |
| Colospace error cost                 | 3        |
| Colospace Error Cost                 | 3        |
| Conflict resolution Vote             |          |
| Create Report                        | Yes      |
| Create SequenceList                  | Yes      |
| Create table                         | Yes      |
| Deletion Cost                        | 3        |
| Genetic code translation             | Standard |
| Guidance only                        | No       |
| Insertion cost                       | 3        |
| Insertion Cost                       | 3        |
| Length                               | 0.5      |
| Mask reference sequence              |          |
| Match mode random                    |          |
| Max alignments                       | 1        |
| Max distance                         | 250      |
| Maximum coverage                     | 50000    |
| Maximum expected variations (ploidy) | 2        |
| Maximum gap and mismatch count       | 2        |
| Min distance                         | 180      |

|                               |                                                                                                                                                                         |
|-------------------------------|-------------------------------------------------------------------------------------------------------------------------------------------------------------------------|
| Minimum average quality       | 15                                                                                                                                                                      |
| Minimum central quality       | 20                                                                                                                                                                      |
| Minimum coverage              | 5                                                                                                                                                                       |
| Minimum paired-end coverage   | 0                                                                                                                                                                       |
| Minimum variant frequency (%) | 10.0                                                                                                                                                                    |
| Mismatch cost                 | 2                                                                                                                                                                       |
| Mismatch Cost                 | 2                                                                                                                                                                       |
| Read settings                 |                                                                                                                                                                         |
| Reference sequences           | chr21, chr22, chrY, chr20, chr19,<br>chr18, chr17, chr16, chr15, chr14,<br>chr13, chr12, chr11, chr10, chr9, chr8,<br>chrX, chr7, chr6, chr5, chr4, chr3,<br>chr2, chr1 |
| Report type                   | 1x, 5x, 10x, 20x, 40x, 80x, 100x                                                                                                                                        |
| Score limit                   | 8                                                                                                                                                                       |
| Sequence masking              | No                                                                                                                                                                      |
| Similarity                    | 0.8                                                                                                                                                                     |
| Ungapped alignment            | Yes                                                                                                                                                                     |
| Use annotated amplicons       | No                                                                                                                                                                      |
| Variant count threshold       | 50                                                                                                                                                                      |
| Window length                 | 11                                                                                                                                                                      |

**Supplementary Table 4: Coverage Metrics CLC bio Genomics Workbench (version 5.1)**

| HapMap    | Sample Type | Library ID | Reads      | Mapped     |        | On-Target % |        | ADoC    | C1     | C10    | C20    | C30    | C50    | C100   | Coverage  |
|-----------|-------------|------------|------------|------------|--------|-------------|--------|---------|--------|--------|--------|--------|--------|--------|-----------|
| Sample ID |             |            |            |            |        |             |        |         |        |        |        |        |        |        | 0.2X Mean |
| NA12003   | gDNA        | 759L       | 36,453,208 | 19,290,598 | 52.92% | 8,577,722   | 44.47% | 2309.47 | 99.43% | 98.47% | 98.15% | 97.92% | 97.39% | 96.24% | 87.49%    |
|           | WGA         | 765L       | 36,986,943 | 20,508,825 | 55.45% | 9,361,663   | 45.65% | 2541.34 | 99.41% | 98.56% | 98.15% | 97.83% | 97.34% | 96.54% | 86.97%    |
|           | gDNA-pB     | 770L_BC1   | 10,031,809 | 5,627,776  | 56.10% | 2,489,710   | 44.24% | 671.32  | 98.82% | 97.75% | 96.79% | 96.16% | 94.66% | 90.56% | 87.63%    |
|           | gDNA-pA     | 792L_BC1   | 5,221,822  | 2,678,148  | 51.29% | 1,142,288   | 42.65% | 302.78  | 98.37% | 96.43% | 94.70% | 92.87% | 89.08% | 77.89% | 87.03%    |
| NA12004   | gDNA        | 760L       | 39,005,646 | 19,804,791 | 50.77% | 9,852,432   | 49.75% | 2606.79 | 99.25% | 98.37% | 98.03% | 97.76% | 97.37% | 96.35% | 87.66%    |
|           | WGA         | 766L       | 43,079,257 | 16,264,344 | 37.75% | 6,035,720   | 37.11% | 1515.41 | 99.22% | 98.01% | 97.45% | 97.17% | 96.55% | 94.84% | 86.28%    |
|           | gDNA-pB     | 770L_BC2   | 3,272,424  | 1,883,818  | 57.57% | 987,460     | 52.42% | 266.77  | 98.17% | 96.45% | 94.75% | 92.74% | 88.77% | 76.85% | 88.16%    |
|           | gDNA-pA     | 792L_BC2   | 6,023,113  | 3,088,315  | 51.27% | 1,546,582   | 50.08% | 408.18  | 98.40% | 96.94% | 95.64% | 94.33% | 91.75% | 84.79% | 87.41%    |
| NA10838   | gDNA        | 761L       | 35,573,703 | 14,695,823 | 41.31% | 5,705,050   | 38.82% | 1481.41 | 99.24% | 98.20% | 97.73% | 97.27% | 96.55% | 94.89% | 87.12%    |
|           | WGA         | 767L       | 43,140,968 | 21,584,861 | 50.03% | 8,194,931   | 37.97% | 2189.59 | 99.42% | 98.54% | 98.14% | 97.80% | 97.16% | 96.04% | 87.69%    |
|           | gDNA-pB     | 770L_BC3   | 7,114,637  | 3,869,662  | 54.39% | 1,809,019   | 46.75% | 489.74  | 98.70% | 97.19% | 95.95% | 94.97% | 92.83% | 86.75% | 87.12%    |
|           | gDNA-pA     | 792L_BC3   | 6,587,601  | 3,489,971  | 52.98% | 1,600,827   | 45.87% | 430.28  | 98.54% | 97.00% | 95.71% | 94.49% | 91.72% | 85.08% | 87.00%    |
| NA11829   | gDNA        | 762L       | 39,864,620 | 18,798,516 | 47.16% | 7,830,282   | 41.65% | 2099.65 | 99.47% | 98.47% | 98.09% | 97.70% | 97.15% | 96.00% | 87.03%    |
|           | gDNA-pB     | 770L_BC4*  | 638,985    | 354,599    | 55.49% | 161,742     | 45.61% | 43.75   | 95.99% | 83.63% | 66.47% | 49.70% | 28.12% | 9.87%  | 86.54%    |

|                |         |           |                                               |            |        |            |        |         |        |        |        |        |        |        |        |
|----------------|---------|-----------|-----------------------------------------------|------------|--------|------------|--------|---------|--------|--------|--------|--------|--------|--------|--------|
|                | gDNA-pA | 792L_BC4* | 677,767                                       | 335,666    | 49.53% | 139,652    | 41.60% | 36.98   | 95.38% | 80.11% | 59.39% | 41.17% | 22.45% | 6.88%  | 85.65% |
| NA11830        | gDNA    | 763L      | 38,654,830                                    | 20,144,033 | 52.11% | 9,425,152  | 46.79% | 2557.17 | 99.53% | 98.61% | 98.21% | 97.92% | 97.42% | 96.45% | 87.07% |
|                | gDNA-pB | 770L_BC5  | Insufficient amount of material to run sample |            |        |            |        |         |        |        |        |        |        |        |        |
|                | gDNA-pA | 792L_BC5  | 5,403,560                                     | 2,832,411  | 52.42% | 1,296,850  | 45.79% | 346.19  | 98.38% | 96.87% | 95.24% | 93.64% | 90.28% | 81.46% | 86.91% |
| NA10856        | gDNA    | 764L      | 43,185,707                                    | 22,650,137 | 52.45% | 9,489,382  | 41.90% | 2574.94 | 99.53% | 98.68% | 98.24% | 98.01% | 97.58% | 96.55% | 86.90% |
|                | gDNA-pB | 770L_BC6  | 9,255,333                                     | 5,136,664  | 55.50% | 2,156,020  | 41.97% | 584.63  | 98.90% | 97.62% | 96.70% | 95.74% | 93.93% | 89.00% | 87.30% |
|                | gDNA-pA | 792L_BC6  | 6,435,690                                     | 3,407,875  | 52.95% | 1,423,554  | 41.77% | 381.03  | 98.64% | 96.96% | 95.54% | 93.84% | 90.87% | 82.48% | 86.57% |
| Pooled Samples | gDNA    | 768L_1    | 41,913,860                                    | 21,748,402 | 51.89% | 9,833,007  | 45.21% | 2627.27 | 99.55% | 98.63% | 98.22% | 98.05% | 97.67% | 96.85% | 87.01% |
|                | gDNA    | 768L_2    | 41,958,628                                    | 22,079,022 | 52.62% | 10,073,995 | 45.63% | 2700.44 | 99.47% | 98.66% | 98.25% | 98.08% | 97.69% | 96.90% | 87.25% |

**Supplementary Table 5: An overview of all SNPs and genotypes detected**

**(A separate Excel sheet)**



**Supplementary Table 6: Sequence Data Generated using 454 FLX and Illumina of the Same Target Regions (172kb/384 exons)**

| <b>Targeted Sequencing Results</b>  | <b>454 FLX</b> | <b>Illumina</b> |
|-------------------------------------|----------------|-----------------|
| Total Reads                         | 219,876        | 5,954,822       |
| Reads Mapping to Target Regions     | 184,641        | 2,337,390       |
| Average Mapped Reads per Amplicon   | 482            | 5,343           |
| Percent of Target Amplicons Covered | 99.7%          | 99.7%           |
| Target Uniformity (<10-fold)        | 96%            | 98%             |

### Supplementary Table 7: Sample Multiplexing Calculation

| Library ID                          | Bar-code              | Reads             | Mapped to Genome | Mapped on Target |
|-------------------------------------|-----------------------|-------------------|------------------|------------------|
| 792L                                | BC1                   | 5,221,822         | 31.60%           | 64.20%           |
|                                     | BC2                   | 6,023,113         | 32.50%           | 72.90%           |
|                                     | BC3                   | 6,587,601         | 34.00%           | 67.60%           |
|                                     | BC4                   | 677,767           | 28.50%           | 66.40%           |
|                                     | BC5                   | 5,403,560         | 32.80%           | 68.10%           |
|                                     | BC6                   | 9,255,333         | 36.30%           | 61.30%           |
|                                     | Total Reads (BC1-BC6) | <b>33,169,196</b> |                  |                  |
|                                     | Average (BC1-BC6)     |                   | <b>32.62%</b>    | <b>66.75%</b>    |
| <b>Total Reads per Octet</b>        |                       |                   |                  |                  |
| Total Reads per Octet               | A                     | 33,169,196        |                  |                  |
| Average % of Reads Mapped to Genome | B                     | 32.62%            |                  |                  |
| Mapped Reads                        | C                     | 10,818,686        | = A*B            |                  |
| % of read on Target                 | D                     | 66.75%            |                  |                  |
| Reads on Target                     | E                     | 7,221,473         | = C*D            |                  |
| Read length (bases)                 | F                     | 50                |                  |                  |
| Bases per Octet                     | G                     | 361,073,648       | = E*F            |                  |
| Bases per Sample*                   | H                     | 17,280,500        |                  |                  |
| Samples per Octet                   | I                     | 20                | = G/H            |                  |
| Sample per Flow Cell                | J                     | 160               | = I*8            |                  |
| Samples per Run                     | K                     | 320               | = I*16           |                  |

\*Bases per Sample = # of amplicon bases \* 100
